# Supplementary material for: The eIF4F and eIFiso4F Complexes of Plants: An Evolutionary Perspective
Source: Hindawi journal article supplement (doi:10.1155/2012/287814), 2012-01-01
Supplement: f1 [file 287814.f1.pdf]

**Supplementary Table 1.** eIF4G and eIFiso4G gene names used in alignments and gene project or NCBI locus/transcript ID. Expressed sequence tag (EST) sourced sequences are italicized.

| Plant eIF4G                  |                                        |
|------------------------------|----------------------------------------|
| Gene                         | ID                                     |
| Adiantum.capillus-veneris.4G | <i>BP915997.1</i>                      |
| Amborella.trichopoda.4G      | <i>CV011294.1</i>                      |
| Aquilegia.coerulea.4G        | AcoGoldSmith_v1.000275m                |
| Arabidopsis.thaliana.4G      | AT3G60240                              |
| Arabidopsis.lyrata.4G        | 939058                                 |
| Brachypodium.distachyon.4G   | Bradi1g25000                           |
| Brachypodium.distachyon.4G2  | Bradi5g17250.1                         |
| Carica.papaya.4G             | evm.TU.supercontig_52.78               |
| Ceratopteris.richardii.4G    | <i>CV011294.1</i>                      |
| Chlamydomonas.reinhardtii.4G | Cre17_g696250                          |
| Citrus.clementina.4G         | clementine0.9_000112m.g                |
| Cucumis.sativus.4G1          | Cucsa.265850                           |
| Cucumis.sativus.4G2          | Cucsa.256840.1                         |
| Eucalyptus.grandis.4G        | Eucgr.E01663                           |
| Fragaria.vesca.4G            | gene03047-v1.0-hybrid                  |
| Glycine.max.4G1              | Glyma07g13380                          |
| Glycine.max.4G2              | Glyma03g25390                          |
| Glycine.max.4G3              | Glyma08g45420                          |
| Glycine.max.4G4              | Glyma01g23500                          |
| Manihot.esculenta.4G1        | cassava4.1_000086m.g                   |
| Manihot.esculenta.4G2        | cassava4.1_000081m.g                   |
| Medicago.truncatula.4G       | Medtr8g008440                          |
| Micromonas.CCMP1545.4G       | MICPUCDRAFT_6369,<br>MICPUCDRAFT_64212 |
| Micromonas.RCC299.4G         | MICPUN_71782                           |
| Mimulus.guttatus.4G1         | mgv1a000123m.g                         |
| Mimulus.guttatus.4G2         | mgv1a000230m.g                         |
| Oryza.sativa.4G              | LOC_Os07g36940                         |
| Ostreococcus.lucimarinus.4G  | OSTLU_7162 (and upstream)              |
| Ostreococcus.tauri.4G        | Ot03g00710 (and upstream)              |
| Physcomitrella.patens.4G1    | Pp1s96_61V6                            |
| Physcomitrella.patens.4G2    | Pp1s96_133V6                           |
| Picea.glauca.4G              | <i>BT108681.1, BT111027.1</i>          |
| Picea.sitchensis.4G          | <i>DR535248.1</i>                      |

| Plant eIFiso4G                  |                              |
|---------------------------------|------------------------------|
| Gene                            | ID                           |
| Aquilegia.coerulea.iso4G1       | AcoGoldSmith_v1.001135m      |
| Arabidopsis.lyrata.iso4G1       | 495887                       |
| Arabidopsis.lyrata.iso4G2       | 481263                       |
| Arabidopsis.lyrata.iso4G3       | 353746                       |
| Arabidopsis.thaliana.iso4G1     | AT5G57870.1                  |
| Arabidopsis.thaliana.iso4G2     | AT2G24050.1                  |
| Aristolochia.fimbriata.iso4G    | <i>FD763516.1</i>            |
| Brachypodium.distachyon.iso4G   | Bradi5g14690.1               |
| Carica.papaya.iso4G             | evm.model.supercontig_46.175 |
| Chlamydomonas.reinhardtii.iso4G | CHLREDRAFT_147254            |
| Chlorella.variabilis.iso4G      | CHLNCDRAFT_142387            |
| Citrus.clementina.iso4G1        | clementine0.9_002686m        |
| Citrus.clementina.iso4G2        | clementine0.9_031294m        |
| Citrus.sinensis.iso4G1          | orange1.1g045399m            |
| Citrus.sinensis.iso4G2          | orange1.1g003543m            |
| Cucumis.sativus.iso4G1          | Cucsa.170670.1               |
| Cucumis.sativus.iso4G2          | Cucsa.271430.1               |
| Eucalyptus.grandis.iso4G1       | Eucgr.C00248.1               |
| Eucalyptus.grandis.iso4G2       | Eucgr.C00247.1               |
| Fragaria.vesca.iso4G1           | gene15000-v1.0-hybrid        |
| Fragaria.vesca.iso4G2           | gene10104-v1.0-hybrid        |
| Glycine.max.iso4G1              | Glyma17g08030.1              |
| Glycine.max.iso4G2              | Glyma06g30880.1              |
| Glycine.max.iso4G3              | Glyma02g36680.1              |
| Glycine.max.iso4G4              | Glyma04g23560.1              |
| Manihot.esculenta.iso4G1        | cassava4.1_001915m           |
| Manihot.esculenta.iso4G2        | cassava4.1_001934m           |
| Medicago.truncatula.iso4G       | Medtr8g145060.1              |
| Micromonas.CCMP1545.iso4G       | MICPUCDRAFT_42607            |
| Micromonas.RCC299.iso4G         | fgenes2_pg.C_Ch10000089      |
| Mimulus.guttatus.iso4G1         | mgv1a001641m                 |
| Mimulus.guttatus.iso4G2         | mgv1a002526m                 |
| Oryza.sativa.iso4G1             | LOC_Os04g42140.1             |

| Heterokont eIF4G               |                                     |
|--------------------------------|-------------------------------------|
| Gene                           | ID                                  |
| Albugo.laibachii.4G1           | CCA22694.1                          |
| Albugo.laibachii.4G2           | CCA13992.1                          |
| Aureococcus.anophagefferens.4G | AURANDRAFT_21900                    |
| Cyanidioschyzon.merolae.4G1    | CMS073C                             |
| Cyanidioschyzon.merolae.4G2    | CMQ348C                             |
| Ectocarpus.siliculosus.4G1     | CBN76090.1                          |
| Ectocarpus.siliculosus.4G2     | CBJ33927.1                          |
| Phaeodactylum.tricornutum.4G1  | PHATRDRAFT_47943                    |
| Phaeodactylum.tricornutum.4G2  | PHATRDRAFT_44298                    |
| Phytophthora.infestans.4G1     | PITG_15393                          |
| Phytophthora.infestans.4G2     | PITG_14278                          |
| Thalassiosira.pseudonana.4G1   | THAPSDRAFT_264322<br>(and upstream) |
| Thalassiosira.pseudonana.4G2   | THAPSDRAFT_261777                   |

| Plant eIF4G                   |                                   |
|-------------------------------|-----------------------------------|
| Gene                          | ID                                |
| Populus.trichocarpa.4G1       | POPTR_0014s05150                  |
| Populus.trichocarpa.4G2       | POPTR_0002s14110                  |
| Prunus.persica.4G             | ppa000085m.g                      |
| Ricinus.communis.4G           | 29709.t000028                     |
| Selaginella.moellendorffii.4G | 104901 (and upstream)             |
| Setaria.italica.4G1           | Si028648m.g                       |
| Setaria.italica.4G2           | Si012624m.g                       |
| Solanum.lycopersicum.4G1      | Solyc01g088700.2.1                |
| Solanum.lycopersicum.4G2      | Solyc08g077700.2.1                |
| Solanum.tuberosum.4G1         | PGSC0003DMP400003096              |
| Solanum.tuberosum.4G2         | PGSC0003DMP400003312              |
| Sorghum.bicolor.4G1           | Sb02g036110.1                     |
| Sorghum.bicolor.4G2           | Sb06g024070.1                     |
| Thellungiella.halophila.4G    | Thhalv10005736m.g                 |
| Theobroma.cacao.4G            | CGD0004103                        |
| Triticum.aestivum.4G          | AEQ49596.1                        |
| Vitis.vinifera.4G             | LOC100261523                      |
| Volvox.carteri.4G             | VOLCADRAFT_8041<br>(and upstream) |
| Zea.mays.4G                   | GRMZM2G386430                     |
| Zea.mays.4G2                  | GRMZM2G153162_T01                 |
| Zea.mays.4G3                  | GRMZM5G821988_T01                 |

| Plant eIFiso4G                   |                           |
|----------------------------------|---------------------------|
| Gene                             | ID                        |
| Oryza.sativa.iso4G2              | LOC_Os02g39840.1          |
| Ostreococcus.lucimarinus.iso4G   | fgenes1_pg.C_Ch1_19000003 |
| Physcomitrella.patens.iso4G1     | Pp1s65_89V6.1             |
| Physcomitrella.patens.iso4G2     | Pp1s65_80V6.1             |
| Physcomitrella.patens.iso4G3     | Pp1s65_106V6.1            |
| Physcomitrella.patens.iso4G4     | Pp1s34_174V6.1            |
| Physcomitrella.patens.iso4G5     | Pp1s34_182V6.1            |
| Pinus.radiata.iso4G              | GO096175.1                |
| Pinus.taeda.iso4G                | DN45542.1                 |
| Populus.trichocarpa.iso4G1       | POPTR_0018s11310.1        |
| Populus.trichocarpa.iso4G2       | POPTR_0018s02700.1        |
| Populus.trichocarpa.iso4G3       | POPTR_0006s19600.1        |
| Populus.trichocarpa.iso4G4       | POPTR_0006s28110.1        |
| Prunus.persica.iso4G1            | ppa001769m                |
| Prunus.persica.iso4G2            | ppa001554m                |
| Ricinus.communis.iso4G           | 27455.m000039             |
| Selaginella.moellendorffii.iso4G | 437322                    |
| Setaria.italica.iso4G1           | Si009406m                 |
| Setaria.italica.iso4G2           | Si016412m                 |
| Solanum.lycopersicum.iso4G1      | Solyc12g009960.1.1        |
| Solanum.lycopersicum.iso4G2      | Solyc07g005810.2.1        |
| Solanum.tuberosum.iso4G1         | PGSC0003DMP400013944      |
| Solanum.tuberosum.iso4G2         | PGSC0003DMP400019801      |
| Sorghum.bicolor.iso4G            | Sb06g021600.1             |
| Thellungiella.halophila.iso4G1   | Thhalv10012738m           |
| Thellungiella.halophila.iso4G2   | Thhalv10000058m           |
| Theobroma.cacao.iso4G1           | CGD0032058                |
| Theobroma.cacao.iso4G2           | CGD0031876                |
| Triticum.aestivum.iso4G          | AAA16209.1                |
| Vitis.vinifera.iso4G1            | GSVIVT01035980001         |
| Vitis.vinifera.iso4G2            | GSVIVT01023638001         |
| Volvox.carteri.iso4G             | VOLCADRAFT_103732         |
| Zea.mays.iso4G1                  | GRMZM2G157061_T01         |
| Zea.mays.iso4G2                  | GRMZM2G098577_T01         |
